# Supplementary material
Source: MDPI journal article supplement (https://www.mdpi.com/2072-4292/16/5/876)
Supplement: s1 [file s1 › remotesensing-2845555-supplementary.pdf]

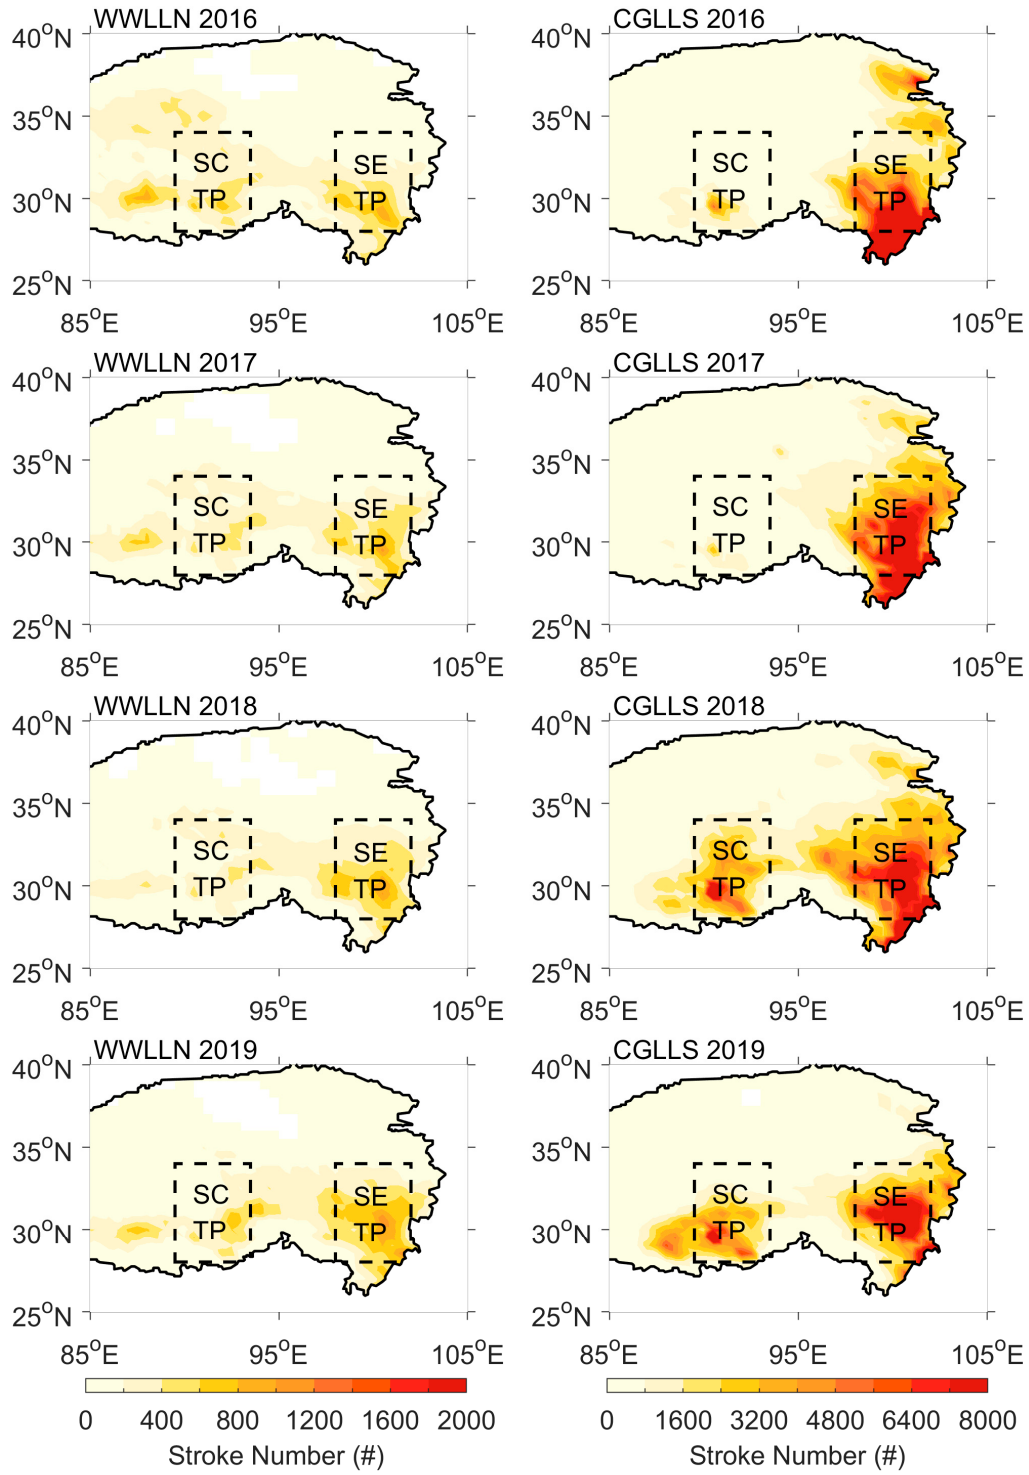

**Figure S1.** The annual spatial distribution of stroke numbers detected by the WWLLN (left column) and the Chinese CGLLS (right column) during 2016-2019. The stroke numbers are the total strokes within  $0.5^\circ \times 0.5^\circ$  grid cell. The two dotted rectangles represent the regions of interest for SC-TP and SE-TP. The black solid line delineates the 3 km contour of the TP.
